# Supplementary material for: Risk factors and incidence of third trimester stillbirths in China
Source: PubMed Central journal article supplement (PMC8209053; doi:10.1038/s41598-021-92106-1), 2021-06-16
Supplement: 41598_2021_92106_MOESM1_ESM.pdf [file 41598_2021_92106_MOESM1_ESM.pdf]

## **Risk Factors and Incidence of Third Trimester Stillbirths in China**

Ying Hu<sup>1#</sup>, Qi Wu<sup>1#</sup>, Jia Liu<sup>1</sup>, Die Hong<sup>1</sup>, Yuqing Zou<sup>1</sup>, Jingjing Lu<sup>1</sup>, Yuhui Wang<sup>1</sup>, Danqing Chen<sup>1</sup>,  
Lu Qi<sup>2\*</sup>, Zhaoxia Liang<sup>1,2\*</sup>

<sup>1</sup> Obstetrical Department, Women's Hospital, School of Medicine, Zhejiang University, Hangzhou, China

<sup>2</sup> Department of Epidemiology, School of Public Health and Tropical Medicine, Tulane University, New Orleans, LA

# Ying Hu and Qi Wu contributed equally to this work

\* Co-corresponding author

\***Correspondence to** Zhaoxia Liang. Obstetrical Department, Women's Hospital, School of Medicine, Zhejiang University, Hangzhou, China. 310006. E-mail: xiaozaizai@zju.edu.cn, Tel: +86571-87061501

## **Supplement: Incidence of third-trimester stillbirths in women and fetuses with different demographic features**

Among the total 107142 mothers, the incidence of third-trimester stillbirths of resident household registration was 0.241% (86/35642), while that of non-resident household registration was 0.352% (252/71500). The highest incidence of third-trimester stillbirths was found in mothers younger than 20 years old, which was 2.381% (4/168), while the incidence of other age groups was 0.349% (165/47331) between 20 and 29 years old, 0.279% (108/38672) between 30 and 34 years old, and 0.291% (61/20971) in over 35 years old.

The incidence of third-trimester stillbirths was 0.315% (315/99879) in HBV-negative pregnant women and 0.317% (23/7263) in HBV-positive pregnant women. Among syphilis seronegative pregnant women, the incidence of third-trimester stillbirths was 0.311% (333/106963), while in syphilis seropositive pregnant women, the incidence increased significantly to 2.793% (5/179).

In single pregnant women, the incidence of third-trimester stillbirths was 0.289% (298/103058), while in twin pregnant women, the incidence increased significantly to 0.991% (40/4035), of which MCMA accounted for 2.5% (1/40), MCDA 50.0% (20/40), DCDA 42.5% (17/40), and two cases of unknown chorionic property. Interestingly, the incidence of third-trimester stillbirths was 0 in triplets' pregnant women.

The overall incidence of third-trimester stillbirths in female fetuses (0.298%, 159/53420) is slightly higher than that in male fetuses (0.265%, 153/57819), excluding 29 with unknown sex.

**Table S1. Incidence of third-trimester stillbirths in women and fetuses with different demographic features**

|                        | mothers of perinatal | mothers of third-trimester stillbirths |               |
|------------------------|----------------------|----------------------------------------|---------------|
|                        | fetuses (N)          | n                                      | incidence (%) |
| Household registration | 107142               | 338                                    |               |
| Resident               | 35642                | 86                                     | 0.241         |
| Non-resident           | 71500                | 252                                    | 0.352         |
| Age, years             |                      |                                        |               |
| <20                    | 168                  | 4                                      | 2.381         |
| 20-29                  | 47331                | 165                                    | 0.349         |
| 30-34                  | 38672                | 108                                    | 0.279         |
| ≥35                    | 20971                | 61                                     | 0.291         |
| Hepatitis B            |                      |                                        |               |
| negative               | 99879                | 315                                    | 0.315         |
| positive               | 7263                 | 23                                     | 0.317         |
| syphilis               |                      |                                        |               |
| negative               | 106963               | 333                                    | 0.311         |
| positive               | 179                  | 5                                      | 2.793         |
| Multiple gestation     |                      |                                        |               |
| singleton              | 103058               | 298                                    | 0.289         |
| twins                  | 4035                 | 40                                     | 0.991         |
| MCMA                   |                      | 1                                      | 2.5           |
| MCDA                   |                      | 20                                     | 50.0          |
| DCDA                   |                      | 17                                     | 42.5          |
| unknown chorionic      |                      | 2                                      | 5.0           |
| property               |                      |                                        |               |
| triplet                | 49                   | 0                                      | 0             |
| infant sex             |                      |                                        |               |

|         |       |     |       |
|---------|-------|-----|-------|
| male    | 57819 | 153 | 0.265 |
| female  | 53420 | 159 | 0.298 |
| unknown | 36    | 29  | 80.6  |

Data are N, n and n/N (%) for cases.
